# Supplementary material for: Therapeutic and diagnostic outcomes of a standardised, comprehensive care pathway for patients with systemic sclerosis
Source: PubMed Central journal article supplement — RMD Open. 2016 Mar 15;2(1):e000159. doi: 10.1136/rmdopen-2015-000159 (PMC4800807; doi:10.1136/rmdopen-2015-000159), 2016-03-15
Supplement: rmdopen-2015-000159supp.pdf [file rmdopen-2015-000159supp.pdf]

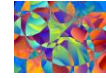

Evaluatieformulier  
Afdeling Sole Mio Ambulante Zorg

Wij stellen het op prijs uw mening te weten over het Zorgpad Sclerodermie zodat wij kunnen nagaan of de zorg voldoende was afgestemd op en voldeed aan uw wensen en behoeften.

Wilt u daarom dit formulier invullen en retourneren d.m.v. bijgevoegde antwoordenvelop?

De verpleegkundige neemt na ontvangst van het ingevulde evaluatieformulier telefonisch contact met u op zodat u één en ander mondeling kunt toelichten.

Als u dit wenst, kunt u het formulier anoniem invullen. Uiteraard kan de verpleegkundige het evaluatieformulier dan niet gebruiken tijdens het bovengenoemde telefonisch contact. Alvast hartelijk dank voor het beantwoorden van onze vragen.

Team Sole Mio Ambulante Zorg

Naam:

Geb. datum:

LUMC nr.:

Data zorgpad:

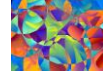

**Evaluatieformulier**  
**Afdeling Sole Mio Ambulante Zorg**

**Organisatie**

1. Was u vooraf voldoende geïnformeerd over het zorgpad sclerodermie?
  - Ja, de informatie voorafgaand aan de dagbehandeling was voldoende.
  - Nee, de informatie voorafgaand aan de dagbehandeling was onvoldoende.
  - Geen mening.

Indien de informatie voor u niet toereikend was. Wat heeft u gemist in de informatievoorziening voorafgaand aan de dagbehandeling? Waarop was u onvoldoende voorbereid?

2. Was u vooraf voldoende geïnformeerd over de inhoud van de verschillende medische onderzoeken zoals echo hart, longfunctie onderzoek enz.?  
  - Ja, de informatie was voldoende.
  - Nee, de informatie was onvoldoende.
  - Geen mening.

Indien de informatie voor u niet toereikend was. Wat heeft u gemist in de informatievoorziening voorafgaand aan de onderzoeken? Waarop was u onvoldoende voorbereid?

3. Was het aangeboden programma afgestemd op uw hulpvragen zoals u die heeft aangegeven in de vooraf door u ingevulde vragenlijst?  
  - Voldoende afgestemd op mijn persoonlijke hulpvragen/situatie.
  - Onvoldoende afgestemd op mijn persoonlijke hulpvragen/situatie.
  - Geen mening.

Opmerking:

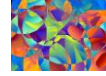


---

Evaluatieformulier  
Afdeling Sole Mio Ambulante Zorg

4. Hoe heeft u de tijdsplanning van de verschillende onderzoeken en gesprekken ervaren?

- Voldoende
- Onvoldoende
- Geen mening

Opmerking:

5. Heeft de arts een afspraak met u gemaakt voor het bespreken van de onderzoeksuitslagen?

- Ja
- Nee

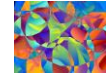

**Evaluatieformulier**  
**Afdeling Sole Mio Ambulante Zorg**

**Zorgverlening**

Onderstaande vragen kunt u beantwoorden door het geven van een cijfer. Wilt u het voor u van toepassing zijnde cijfer omcirkelen?

6. Hoe tevreden was u over de ontvangst op de afdeling?

|                 |   |   |   |   |               |
|-----------------|---|---|---|---|---------------|
| Zeer ontevreden |   |   |   |   | Zeer tevreden |
| 1               | 2 | 3 | 4 | 5 |               |

Opmerking:

Wat dient er naar uw mening te veranderen om ervoor te zorgen dat u zeer tevreden zou zijn over de ontvangst op de afdeling?

7. Hoe tevreden bent u over de bejegening door de zorgverleners?

|                 |   |   |   |   |               |
|-----------------|---|---|---|---|---------------|
| Zeer ontevreden |   |   |   |   | Zeer tevreden |
| 1               | 2 | 3 | 4 | 5 |               |

Opmerking:

Wat dient er naar uw mening te veranderen in de bejegening om ervoor te zorgen dat u zeer tevreden zou zijn?

8. Hoe tevreden bent u over het verloop van de medische onderzoeken?

|                 |   |   |   |   |               |
|-----------------|---|---|---|---|---------------|
| Zeer ontevreden |   |   |   |   | Zeer tevreden |
| 1               | 2 | 3 | 4 | 5 |               |

Opmerking:



**Evaluatieformulier**  
**Afdeling Sole Mio Ambulante Zorg**

Wat dient er naar uw mening te veranderen om ervoor te zorgen dat u zeer tevreden zou zijn over het verloop van de medische onderzoeken.

9. Hoe heeft u de kennis ervaren van de zorgverleners betreffende de aandoening sclerodermie?

Heel weinig kennis Heel veel kennis  
 1 2 3 4 5

Opmerking:

Indien u van mening bent dat de zorgverleners (te) weinig kennis hebben, kunt u dan aangeven op welk gebied u een kennistekort ervaren heeft?

10. Hoe tevreden bent u over de zorg van de verschillende zorgverleners?

**Reumatoloog**

Zeer ontevreden Zeer tevreden  
 1 2 3 4 5

Wat dient er naar uw mening te veranderen in de zorg van de reumatoloog om u zeer tevreden te stemmen?

**Verpleegkundige**

Zeer ontevreden Zeer tevreden  
 1 2 3 4 5

Wat dient er naar uw mening te veranderen in de zorg van de verpleegkundige om u zeer tevreden te stemmen?



**Evaluatieformulier**  
**Afdeling Sole Mio Ambulante Zorg**

Indien van toepassing (afhankelijk van uw individuele programma):

**Fysio- of oefentherapeut**

Zeer ontevreden Zeer tevreden  
 1                      2                      3                      4                      5

Wat dient er naar uw mening te veranderen in de zorg van de fysio- of oefentherapeut om u zeer tevreden te stemmen?

**Ergotherapeut**

Zeer ontevreden Zeer tevreden  
 1                      2                      3                      4                      5

Wat dient er naar uw mening te veranderen in de zorg van de ergotherapeut om u zeer tevreden te stemmen?

**Maatschappelijk werker**

Zeer ontevreden Zeer tevreden  
 1                      2                      3                      4                      5

Wat dient er naar uw mening te veranderen in de zorg van de maatschappelijk werker om u zeer tevreden te stemmen?

11. Met wat voor rapportcijfer (schaal 1-10) waardeert u de totale zorg, inclusief eventuele zotel overnachting, eten, drinken enz.?

Wilt u het van toepassing zijnde cijfer omcirkelen?

Onvoldoende                      Matig                      Voldoende                      Goed                      Zeer goed  
 1    2    3    4    5    6    7    8    9    10

Wat dient er naar uw mening te veranderen om het programma als zeer goed te kunnen waarderen?



---

Evaluatieformulier  
Afdeling Sole Mio Ambulante Zorg

12. Heeft u algemene opmerkingen of suggesties?
