# Supplementary material for: Therapeutic and diagnostic outcomes of a standardised, comprehensive care pathway for patients with systemic sclerosis
Source: PubMed Central journal article supplement — RMD Open. 2016 Mar 15;2(1):e000159. doi: 10.1136/rmdopen-2015-000159 (PMC4800807; doi:10.1136/rmdopen-2015-000159), 2016-03-15
Supplement: rmdopen-2015-000159supp_table.pdf [file rmdopen-2015-000159supp_table.pdf]

Supplementary Table 1: Comparison of patients with teleangiectacias and patients without teleangiectacias for determinants for immunosuppressive medication, vascular complications and gastrointestinal interventions

|                                                                                                                                               | Teleangiectacias<br>absent, n=93<br>(41%) | Teleangiectacias<br>present, n= 133<br>(59%) | P value |
|-----------------------------------------------------------------------------------------------------------------------------------------------|-------------------------------------------|----------------------------------------------|---------|
| mRSS , mean (SD)                                                                                                                              | 6.2 (10)                                  | 4.7 (6)                                      | ns      |
| Interstitial lung disease, n (%)                                                                                                              | 48 (52%)                                  | 65 (49%)                                     | ns      |
| Diffuse cutaneous SSc, n (%)                                                                                                                  | 35 (38%)                                  | 38 (29%)                                     | ns      |
| Disease duration, years; mean (SD)                                                                                                            | 4.7 (6.4)                                 | 8.3 (8.4)                                    | 0.001   |
| Additional pulmonary function test<br>indicated within 12 months after care<br>pathway, n (%)                                                 | 19 (20%)                                  | 14 (11%)                                     | 0.038   |
| Calcinosis, n (%)                                                                                                                             | 6 (7%)                                    | 33 (25%)                                     | < 0.001 |
| Digital Ulcers, n (%)                                                                                                                         | 21 (23%)                                  | 22 (17%)                                     | ns      |
| Estimated SPAP by cardiac ultrasound > 35<br>mmHg, n (%)*                                                                                     | 18 (26%)                                  | 38 (34%)                                     | ns      |
| Discussion of patient's case in<br>multidisciplinary PAH meeting, n (%)                                                                       | 5 (5%)                                    | 18 (14%)                                     | 0.049   |
| Additional cardiac ultrasound indicated<br>within 12 months after care pathway, n (%)                                                         | 1 (1%)                                    | 7 (5%)                                       | 0.09    |
| Start of medication for peripheral vascular<br>complications, n (%)                                                                           | 18 (19%)                                  | 40 (30%)                                     | 0.069   |
| Referral to gastro-enterologist, including<br>requests for specific additional<br>investigations                                              | 14 (15%)                                  | 21 (16%)                                     | ns      |
| Start of proton pump inhibitor or laxantia                                                                                                    | 13 (14%)                                  | 16 (12%)                                     | ns      |
| mRSS = modified Rodnan Skin score, SPAP = systolic arterial pulmonary pressure; PAH = pulmonary arterial hypertension; * available in n = 182 |                                           |                                              |         |

## Translation of questionnaire

### Organisation

1. Did you get sufficient information on the health care program beforehand?
  - Yes, sufficient
  - No, not sufficient.
  - No opinion.

In case you were not adequately informed, which aspects did you not know of beforehand ?

2. Did you get sufficient information specific medical diagnostic tests beforehand, including cardiac ultrasound, pulmonary function test etc?
  - Yes, sufficient
  - No, not sufficient.
  - No opinion.

In case you were not adequately informed, which aspects did you not know of beforehand ?

3. Was the care pathway in line with your health care needs, as evaluated by the questionnaire?
  - Yes
  - No.
  - No opinion.

Remarks:

4. What was your opinion about the time schedule during the 2 days?
  - Sufficient
  - Insufficient.
  - No opinion.

Remarks:

5. Did the physician make an appointment with you to discuss the results?
  - Yes
  - No



## Health care

For next questions we would like you to give your opinion on a scale from 1 to 5, with 5 = very satisfactory, and 1 = very unsatisfactory.

6. Were you satisfied about the way you was welcomed ?

Very unsatisfied very satisfied  
1 2 3 4 5

Remark:

What should be changed?

7. Were you satisfied about the heath care providers?

Very unsatisfied very satisfied  
1 2 3 4 5

Remark:

What should be changed?

8. Were you satisfied about the diagnostic tests performed?

9. Very unsatisfied very satisfied  
1 2 3 4 5

Remark:

What should be changed?

10. Were you satisfied about the specific knowledge on systemic sclerosis of the health care providers?

Very unsatisfied very satisfied  
1 2 3 4 5

Remark:

Is there a specific area where there is lack of knowledge?

11. Were you satisfied about the:

### **Rheumatologist**

Very unsatisfied very satisfied  
1 2 3 4 5
